1 **Population structure analysis and laboratory monitoring of *Shigella* with a standardised**  
2 **core-genome multilocus sequence typing scheme: a validation study**

3

4 Iman Yassine, MSc<sup>1,2</sup>, Sophie Lefèvre, PharmD, PhD<sup>1</sup>, Elisabeth E. Hansen, MSc<sup>1‡</sup>, Corinne  
5 Ruckly<sup>1</sup>, Isabelle Carle<sup>1</sup>, Monique Lejay-Collin, BSc<sup>1</sup>, Laëtitia Fabre, PhD<sup>1</sup>, Rayane Rafei,  
6 PhD<sup>2</sup>, Dominique Clermont, PhD<sup>3</sup>, Maria Pardos de la Gandara MD, PhD<sup>1</sup>, Fouad Dabboussi,  
7 PhD<sup>2</sup>, Nicholas R. Thomson, PhD<sup>4,5</sup>, François-Xavier Weill, MD, PhD<sup>1\*</sup>

8

9 <sup>1</sup>Institut Pasteur, Unité des bactéries pathogènes entériques, Centre National de Référence des  
10 *Escherichia coli*, *Shigella* et *Salmonella*, Paris, 75015, France

11 <sup>2</sup>Laboratoire Microbiologie Santé et Environnement (LMSE), Doctoral School of Sciences and  
12 Technology, Faculty of Public Health, Lebanese University, Tripoli, Lebanon

13 <sup>3</sup>Institut Pasteur, Collection de l'Institut Pasteur, Paris, 75015, France

14 <sup>4</sup>Wellcome Sanger Institute, Cambridge, CB10 1SA, United Kingdom

15 <sup>5</sup>London School of Hygiene and Tropical Medicine, London, WC1E 7HT, United Kingdom

16 <sup>‡</sup>current affiliation: Harvard Medical School, Boston, 02115, United States

17 \*corresponding author: [francois-xavier.weill@pasteur.fr](mailto:francois-xavier.weill@pasteur.fr) (F.- X. Weill).

18

19

20 **Abstract**

21

22 **Background**

23 The laboratory surveillance of bacillary dysentery is based on a *Shigella* typing scheme  
24 standardised in the late 1940s. This scheme classifies *Shigella* strains into four serogroups and  
25 more than 50 serotypes on the basis of biochemical tests and lipopolysaccharide O-antigen  
26 serotyping. Real-time genomic surveillance of *Shigella* infections has been implemented in  
27 several countries, but without the use of a standardised high-resolution typing scheme.

28

29 **Methods**

30 We studied over 4,000 reference strains and clinical isolates of *Shigella*, covering all serotypes,  
31 including provisional serotypes and atypical strains, with the current serotyping scheme. These  
32 strains and isolates were also subjected to whole-genome sequencing and analysis with the  
33 Enterobase *Escherichia/Shigella* 2,513-locus core-genome multilocus sequence typing  
34 (cgMLST) scheme.

35

36 **Findings**

37 The *Shigella* genomes were grouped into eight phylogenetically distinct clusters, within the *E.*  
38 *coli* species. Three of these clusters contained strains from different serogroups and serotypes,  
39 the remaining five each consisting of a single serotype. The cgMLST hierarchical clustering  
40 (HC) analysis at different levels of resolution (HC2000 to HC400) recognised the natural  
41 groupings for *Shigella*. By contrast, the serotyping scheme was affected by horizontal gene  
42 transfer, leading to a conflation of genetically unrelated *Shigella* strains and a separation of  
43 some genetically related strains. We also curated the various provisional serotypes reported in  
44 the literature and described five new *Shigella* serotypes for addition to the typing scheme.

45

46 ***Interpretation***

47 The EnteroBase *Escherichia/Shigella* cgMLST is a standardised, robust, portable, and high-  
48 resolution scheme that will enhance the laboratory surveillance of *Shigella* infections,  
49 particularly for *Shigella flexneri*. However, cgMLST data should be considered together with  
50 *in silico* serotyping data, to maintain backward compatibility with the current *Shigella*  
51 serotyping scheme.

52

53 ***Funding***

54 *Institut Pasteur; Santé publique France*; Fellowship from Association AZM and Saadeh, and  
55 the Lebanese Association for Scientific Research (LASeR) for IY. NRT is funded by the  
56 Wellcome Trust (grant 206194). The funders had no role in study design, data collection and  
57 analysis, decision to publish, or preparation of the manuscript. For the purpose of Open  
58 Access, the authors have applied a CC BY public copyright licence to any Author Accepted  
59 Manuscript version arising from this submission.

60

61

62

## 63 **Introduction**

64

65 *Shigella* belongs to the *Enterobacteriaceae* family, and causes bacillary dysentery, a common  
66 cause of diarrhoea in low- and middle-income countries. It has been estimated that this  
67 intracellular human pathogen, which is transmitted via the faecal-oral route with very low  
68 infectious dose (10-100 cells), is responsible for over 210,000 deaths per year, mostly in  
69 children under the age of five years.<sup>1-3</sup> In high-income countries, *Shigella* infections also occur  
70 in travellers and in some high-risk groups, such as men who have sex with men (MSM) and  
71 Orthodox Jewish communities.<sup>1,3</sup> The morbidity of these infections is currently increasing due  
72 to growing resistance to antimicrobial drugs in these bacteria.<sup>2,3</sup>

73

74 Laboratory surveillance of *Shigella* infections was initiated several decades ago, and was  
75 facilitated by the adoption of a standardised *Shigella* typing scheme in the late 1940s.<sup>4</sup> This  
76 scheme, which is still in use today, is based on biochemical tests and serotyping (slide  
77 agglutination with typing sera directed against the different *Shigella* lipopolysaccharide O-  
78 antigens). It splits the *Shigella* genus into four serogroups (originally considered to be species):  
79 *Shigella dysenteriae*, *S. boydii*, *S. flexneri*, and *S. sonnei*; these four serogroups are then  
80 subdivided into more than 50 serotypes. However, modern population genetics methods, such  
81 as multilocus sequence typing (MLST) analysis, and, more recently, core-genome single-  
82 nucleotide variant (cgSNV) analysis, have shown that *Shigella* forms distinct lineages within  
83 the species *E. coli*, from which it emerged following the acquisition of a large virulence plasmid  
84 (VP) enabling the bacterium to invade intestinal cells.<sup>5-8</sup> In parallel, these host-restricted  
85 pathogens converged independently on the *Shigella* phenotype (non-motility, no  
86 decarboxylation of lysine, no use of citrate and malonate, and other characteristics, as reported  
87 by Pupo and colleagues<sup>5</sup>) through genome degradation. Furthermore, these recent methods have

88 shown that the current typing scheme does not capture the natural groupings of this pathogen.<sup>5</sup>

89 Some molecular data have been taken into account in an update of the *Shigella* serotyping

90 scheme. *S. boydii* 13, for example, was withdrawn from the classification, because it was shown

91 to belong to another species, *E. albertii*, and did not contain the VP.<sup>9,10</sup>

92

93 In an increasing number of countries, the laboratory surveillance of *Shigella* infections has now

94 passed from conventional serotyping to real-time genomic surveillance.<sup>7,11</sup> The genomic

95 methods used were developed recently, and most of their targets lie within the O-antigen gene

96 cluster (*rfb*) or in the *S. flexneri* serotype-converting prophages, to ensure serotype

97 specificity.<sup>11,12</sup> Several other genes in the accessory genome were recently targeted, resulting

98 in the assignment of *Shigella* serotypes to eight clusters.<sup>13</sup> These methods undoubtedly facilitate

99 backward compatibility between the genomic and serotyping data, but do not fully exploit the

100 unprecedented resolution of genomics. An extension of the MLST method to cover a large

101 number of core-genome genes has been developed. This high-resolution method, core-genome

102 MLST (cgMLST), has been successfully used in the surveillance of many pathogens, including

103 *Listeria monocytogenes*,<sup>14</sup> and *Salmonella enterica*.<sup>15</sup> Furthermore, cgMLST data are easy to

104 interpret with clustering threshold methods, such as the hierarchical clustering (HierCC)

105 implemented in Enterobase.<sup>15</sup> However, cgMLST has never been used for the comprehensive

106 description of *Shigella* populations, and the utility of this method for the genomic surveillance

107 of *Shigella* infections has not previously been assessed.

108

109 In this study, by analysing over 4,000 genomes from phenotypically characterised *Shigella*

110 strains representative of the global diversity of this pathovar of *E. coli*, we aimed: i) to resolve

111 the population structure of *Shigella* by cgMLST, (ii) to create a dictionary of correspondence

112 between cgMLST HC and serotyping data, and (iii) to update the *Shigella* serotyping scheme

113 by describing new serotypes. We demonstrate that the combination of cgMLST HC with *rfb*  
114 gene cluster analysis would enhance the laboratory surveillance of *Shigella* infections, while  
115 maintaining backward compatibility with the current serotyping scheme.

116

## 117 **Methods**

118

### 119 ***Strains selection and typing***

120 In total, 4,187 *Shigella* reference strains and clinical isolates from the French National  
121 Reference Centre for *E. coli*, *Shigella*, and *Salmonella* (FNRC-ESS), Institut Pasteur, Paris  
122 were studied (appendix 1). The collection consisted of two datasets. The first dataset – the  
123 reference dataset – consisted of 317 *Shigella* reference strains covering all the known serotypes  
124 – including provisional serotypes – of the four serogroups (at least one strain per serotype);  
125 most of the strains studied were historical strains from various geographic locations and time  
126 periods. The second dataset – the routine dataset – consisted of 3,870 clinical isolates (of the  
127 3,942 isolates received) sequenced by the FNRC-ESS between 2017 and 2020 in the framework  
128 of the French national surveillance programme for *Shigella* infections. All these strains and  
129 isolates were thoroughly characterised with a panel of biochemical tests and serotyped by slide  
130 agglutination assays according to standard protocols, as previously described<sup>16</sup> (appendix 2 p  
131 2).

132

### 133 ***DNA extraction and sequencing***

134 The 4,187 strains and isolates were processed and sequenced with various Illumina platforms  
135 (appendix 2 p 2).

136

137

138 ***Other studied genomes***

139 With the aim of capturing the broadest possible diversity of *Shigella* populations, we searched  
140 the *E. coli/Shigella* database in EnteroBase,<sup>15</sup> and selected 81 additional *Shigella* genomes  
141 (reference+ dataset) not originating from the Institut Pasteur (appendix 2 p 2). We included 27  
142 enteroinvasive *E. coli* (EIEC) and 68 *E. coli* strains from the ECOR collection (appendix 2 p  
143 2), to place our *Shigella* genomes in the phylogenetic context of the broader diversity of *E. coli*.  
144 We also used the closed PacBio sequences available for all *Shigella* serotypes and described by  
145 Kim and colleagues,<sup>17</sup> to study the genetic organisation of the *rfb* gene cluster or various  
146 operons described in the “Gene analyses” section. However, these closed genomes were not  
147 included in the cgMLST analysis, as they were not edited with short reads and the numerous  
148 indels in the homopolymers therefore altered the allelic distances (appendix 2 p 7).

149

150 ***Characterisation of the O-antigen gene clusters***

151 The *Shigella* O-antigen biosynthetic gene (*rfb*) cluster was analysed after extraction of the  
152 region between the housekeeping genes *galF* (encoding UTP-glucose-1-phosphate  
153 uridylyltransferase) and *gnd* (encoding 6-phosphogluconate dehydrogenase), which are known  
154 to flank the *rfb* cluster.<sup>18</sup> Newly identified *rfb* clusters were annotated based on a previously  
155 annotated closely matched *E. coli* cluster in the NCBI BLASTn nucleotide collection (nr/nt)  
156 database (100% coverage and at least 99% identity) or with ORFfinder  
157 (<https://www.ncbi.nlm.nih.gov/orffinder/>) when no matching cluster was found in the NCBI  
158 BLAST database (<https://blast.ncbi.nlm.nih.gov/Blast.cgi>). The GenBank accession codes of  
159 all the *Shigella rfb* clusters are listed in appendix 2 p 8. We also used three tools for *in silico*  
160 serotyping: SeroPred, the serotype prediction tool implemented in EnteroBase,<sup>15</sup> ShigaTyper,<sup>11</sup>  
161 and ShigEiFinder.<sup>13</sup> Short-read and SPAdes assemblies were used for ShigaTyper and  
162 ShigEiFinder, respectively.

163

#### 164 ***Phylogenetic analyses***

165 We used the *Escherichia/Shigella* cgMLST scheme (2,513 loci) implemented in EnteroBase to  
166 study our genomic datasets (appendix 2 p 2).<sup>19</sup> The cgMLST trees were inferred with the NINJA  
167 NJ algorithm, based on the “cgMLST V1 + HierCC” scheme. We visualised the cgMLST data  
168 with GrapeTree.<sup>20</sup> We also performed cgSNV analysis, to assess the phylogenetic relationships  
169 of 398 *Shigella* (317 from the reference dataset and 81 from the reference+ dataset) and 95 *E.*  
170 *coli* (68 ECOR and 27 EIEC) strains (appendix 2 p 2). A phylogenetic tree of *rfb* sequences  
171 was constructed with the sequences from 43 *Shigella* (appendix 2 p 2 and p 8) and 196 *E. coli*  
172 isolates from DebRoy and colleagues.<sup>18</sup>

173

#### 174 ***Gene analyses***

175 The presence of the *ipaH* gene, a multicopy gene unique to *Shigella* and EIEC,<sup>21</sup> the presence  
176 and structure of the mannitol (*mtl*),<sup>22</sup> raffinose,<sup>23</sup> and tryptophanase (*tna*) operons,<sup>24</sup> and the  
177 type of the O-antigen gene cluster (*rfb*) were determined on SPAdes assemblies using the NCBI  
178 BLASTn tool (<https://blast.ncbi.nlm.nih.gov/Blast.cgi>). The target sequences are described in  
179 appendix 2 p 9.

180

#### 181 ***Data Availability Statement***

182 Short-read sequence data were submitted to EnteroBase (<https://enterobase.warwick.ac.uk/>),<sup>15</sup>  
183 and to the European Nucleotide Archive (<https://www.ebi.ac.uk/ena/browser/home>) under  
184 study numbers PRJEB44801, PRJEB2846, and PRJEB2128. The GrapeTree of the reference  
185 and reference+ datasets is publicly available from EnteroBase  
186 ([http://enterobase.warwick.ac.uk/ms\\_tree?tree\\_id=55118](http://enterobase.warwick.ac.uk/ms_tree?tree_id=55118)). All the GenBank and ENA  
187 accession numbers of the genomes used in this study are listed in appendix 1.



## 188 **Results**

189

190 We assembled and sequenced a collection of 317 *Shigella* strains chosen on the basis of their  
191 representativeness of the known diversity of *Shigella* populations (i.e., covering all serogroups  
192 and serotypes, and the different lineages or phylogroups of *S. sonnei* and *S. flexneri*). The  
193 genomic diversity of this reference dataset was increased further, by adding another 81 publicly  
194 available *Shigella* genomes. The 398 genomes studied were from strains belonging to the *S.*  
195 *flexneri* ( $n = 191$ ), *S. dysenteriae* ( $n = 83$ ), *S. boydii* ( $n = 80$ ), and *S. sonnei* ( $n = 44$ ) serogroups  
196 (appendix 2 pp 10-11). We determined the wider phylogenetic context of these *Shigella*  
197 genomes, by also analysing 95 *E. coli* genomes, including 27 EIEC from eight different EIEC  
198 genomic clusters and 68 (of the 72) strains from the ECOR collection, considered representative  
199 of the diversity of natural populations of *E. coli*.<sup>25</sup> These 493 genomes were studied by two  
200 different approaches: the EnteroBase *Escherichia/Shigella* cgMLST scheme and SNV-based  
201 clustering.

202

203 According to cgMLST, all these genomes belonged to the same hierarchical cluster, HC2350\_1  
204 (appendix 1). As expected, all the *Shigella* and EIEC genomes contained the pathogenicity gene  
205 *ipaH*, whereas the ECOR genomes did not (appendix 2 p 16). A NINJA neighbour-joining (NJ)  
206 tree of core genomic allelic distances was generated with the dataset for the 493 *Shigella* and  
207 *E. coli* genomes (Fig. 1). Visual examination of the colour-coded HC2000 tree revealed that the  
208 *Shigella* genomes were grouped into eight different HC2000 clusters (Fig. 1B). Seven of these  
209 HC2000 clusters contained exclusively *Shigella* genomes. The eighth, HC2000\_2, contained *S.*  
210 *dysenteriae* type 8 and *E. coli* (EIEC and ECOR) genomes. Four HC2000 clusters contained  
211 *Shigella* genomes from a single serotype: HC2000\_305 (*S. sonnei*), HC2000\_1463 (*S.*  
212 *dysenteriae* type 1), HC2000\_44944 (*S. dysenteriae* 10), and HC2000\_45542 (*S. boydii* 12).

213 These clusters are referred to below as SON, SD1, SD10, and SB12, respectively. Three  
214 clusters, HC2000\_1465, HC2000\_4118, and HC2000\_192, consisted of multiple serogroups  
215 and serotypes (Figs. 1-4). The first of these clusters, HC2000\_1465, contained various  
216 serotypes of *S. dysenteriae* (3, 4-7, 9, 11-15, provisional (prov.) 93-119, prov. SH-103, prov.  
217 97-10607, prov. SH-105, prov. 96-3162 and prov. 204/96), *S. boydii* (1-4, 6, 8, 10, 11, 14, 18-  
218 20, and prov. 07-6597), and *S. flexneri* type 6 (Fig. 2), consistent with Cluster 1 described by  
219 Pupo and colleagues in their MLST analysis of 46 diverse *Shigella* strains.<sup>5</sup> The HC2000\_1465  
220 cluster, named S1, can be divided into five HC1100 clusters (Fig. 2). Only the HC1100\_36524  
221 cluster (subcluster S1d) contained strains from a single serotype, *S. dysenteriae* 7. The  
222 HC1100\_45518 cluster (S1e) contained only *S. flexneri* 6 strains, but most strains from this  
223 serotype were in another HC1100, HC1100\_1465 (S1b), along with *S. dysenteriae* 3 and various  
224 serotypes of *S. boydii*. The HC1100\_1466 cluster (S1c) contained *S. dysenteriae* 5 and various  
225 serotypes of *S. boydii*. Finally, the HC1100\_4194 cluster (S1a) included only *S. dysenteriae*  
226 strains, but from diverse serotypes. *S. dysenteriae* 3 was found in two different S1 subclusters,  
227 S1a and S1b. At a higher level of resolution, four *Shigella* serotypes were grouped within  
228 specific HC400 clusters, whereas the other serotypes were split between two to six HC400  
229 clusters (appendix 2 p 12).

230

231 The second cluster, HC2000\_4118, comprised various serotypes of *S. dysenteriae* (2, prov.  
232 E670/74, prov. 96-265, and prov. BEDP 02-5104) and *S. boydii* (5, 7, 9, 11, 15-17) (Fig. 3).  
233 This cluster, consisting exclusively of indole-positive strains, corresponds to the Cluster 2  
234 described by Pupo and colleagues.<sup>5</sup> The HC2000\_4118 cluster, hereafter referred to as S2, could  
235 be divided into six distinct HC1100 clusters (Fig. 3). Five of these HC1100 clusters contained  
236 exclusively *S. boydii*; the sixth, HC1100\_4191 (subcluster S2d), contained *S. boydii* 15 and all  
237 the *S. dysenteriae* serotypes found in S2. Three HC1100 clusters contained a single serotype:

238 HC1100\_11401 (S2f) for *S. boydii* 7, HC1100\_7057 (S2e) for *S. boydii* 9, and HC1100\_11421  
239 (S2c) for *S. boydii* 11. This last serotype was also found in the S1 cluster (S1b subcluster). At  
240 higher resolution, it was possible to assign some serotypes to a particular HC400 cluster. This  
241 was the case for *S. boydii* 16 (HC400\_11449) and *S. boydii* 17 (HC400\_11452). However, at  
242 this level of resolution, other serotypes were split between two to four clusters (appendix 2  
243 p12).

244  
245 The third cluster, HC2000\_192, comprised *S. boydii* prov. E1621-54 and all serotypes and  
246 subserotypes of *S. flexneri*, with the exception of *S. flexneri* 6, which grouped in S1 (Fig. 4).  
247 This cluster seems to correspond to the Cluster 3 reported by Pupo and colleagues,<sup>5</sup> except that  
248 *S. boydii* 12 rather than *S. boydii* prov. E1621-54 was reported in Cluster 3 in this previous  
249 study (see discussion). This HC2000\_192 cluster, hereafter referred to as S3, could be divided  
250 into seven distinct HC1100 clusters (Fig. 4A). One of these S3 subclusters, HC1100\_11429,  
251 contained exclusively *S. boydii* prov. E1621-54. The other six HC1100 clusters contained two  
252 or more *S. flexneri* serotypes per cluster. Connor and colleagues previously subdivided >350  
253 genomes of *S. flexneri* 1-5, X, Y into seven phylogenetic groups (PGs), based on a Bayesian  
254 analysis of population structure.<sup>2</sup> As 140 *S. flexneri* genomes from our study were included in  
255 the analysis by Connor and colleagues,<sup>2</sup> we compared the clustering by cgMLST HC1100 to  
256 that obtained by PG. HC1100\_204, HC1100\_543, HC1100\_1468, HC1100\_11594,  
257 HC1100\_1530 corresponded to PG2, PG4, PG5, PG6 and PG7, respectively (Fig. 4).  
258 HC1100\_192 encompassed PG1 and PG3, and the use of a higher HC resolution made it  
259 possible to link HC400\_192 to PG3. However, PG1 did not correspond to a single HC400  
260 cluster. Instead, it corresponded to two such clusters: HC400\_237 and HC400\_327.

261

262 We evaluated the accuracy of cgMLST HC for grouping *Shigella* genomes into different  
263 phylogenetic clusters by employing another approach: using the same dataset of 493 *E. coli* and  
264 *Shigella* genomes, we constructed a maximum-likelihood tree based on 8,003 SNV differences,  
265 and compared this SNV-based clustering (with strong bootstrap support) to the cgMLST HC  
266 data. There were no observable differences between the two approaches (Fig. 5).

267

268 To confirm the robustness of the population structure of *Shigella* established by cgMLST  
269 analysis of our reference datasets was robust, we also applied cgMLST to 3,870 clinical *Shigella*  
270 isolates received by the FNRC-ESS between 2017 and 2020, in the framework of the French  
271 national surveillance programme for *Shigella* infections. All these isolates were characterised  
272 phenotypically, on the basis of biochemical reactions and serotyping. They belonged to *S.*  
273 *dysenteriae* ( $n = 53$ ), *S. boydii* ( $n = 101$ ), *S. flexneri* ( $n = 1,555$ ), and *S. sonnei* ( $n = 2,161$ ). All  
274 but one of these 3,870 genomes were assigned to known serotype/HC2000/HC1100/HC400  
275 combinations, without inconsistencies (appendix 1, appendix 2 p 17). The exception was an  
276 HC1100\_204 (PG2) *S. flexneri* isolate, grouped into a new HC400 cluster, HC400\_11853.

277

278 *In silico* serotyping tools have been developed by various groups, and can be used to maintain  
279 links with the current *Shigella* serotyping system. We assessed the performances of the three  
280 tools currently available: the EnteroBase “SeroPred” tool,<sup>15</sup> ShigaTyper,<sup>11</sup> and ShigEiFinder,<sup>13</sup>  
281 with our 317 genomes from well-characterised reference strains. ShigEiFinder (appendix 2 pp  
282 13-14) gave the best serotype prediction results. However, 100% of the strains belonging to *S.*  
283 *boydii* 10 and to the new serotype *S. dysenteriae* 17, and 14-20% of the strains from *S.*  
284 *dysenteriae* 11, *S. dysenteriae* 14, and *S. boydii* 2 were not identified. All the strains from *S.*  
285 *dysenteriae* prov. BEDP 02-5104 were incorrectly predicted to be *S. dysenteriae* 2, whereas

286 83% of the strains from the new serotype *S. dysenteriae* 16 were incorrectly predicted to be *S.*  
287 *dysenteriae* prov. 96-265 and 13% were not assigned.

288

289 In recent decades, several provisional new serotypes of *S. dysenteriae* and *S. boydii* have been  
290 described by different groups across the world.<sup>26,27</sup> However, the phylogenetic relationships  
291 between these provisional serotypes and between these serotypes and other *Shigella* populations  
292 have not been investigated. We characterised these relationships in detail (appendix 2 pp 3-5).  
293 We found that all these provisional serotypes belonged to the three main *Shigella* clusters, S1  
294 to S3 (Figs. 2-4), and that many of those reported under different names were actually identical  
295 (appendix 2 pp 3-5). We propose adding *S. dysenteriae* 16-18, and *S. boydii* 21 and 22 to the  
296 current serotyping scheme, retaining provisional status for *S. dysenteriae* prov. BEDP 02-5104.  
297 All the reference strains for these new serotypes are now available from the *Collection de l'*  
298 *Institut Pasteur* (CIP) or the National Collection of Type Cultures (NCTC) (appendix 2 pp 3-  
299 5).

300

## 301 **Discussion**

302 We present here a broad overview of the population of *Shigella*. The hierarchical clustering of  
303 cgMLST data and a cgSNV analysis showed that *Shigella* strains belong to eight  
304 phylogenetically distinct clusters, within the species *E. coli*. Our results are consistent with  
305 previous studies suggesting multiple origins of the *Shigella* phenotype.<sup>5,28</sup> However, the higher  
306 resolution of cgMLST, and comprehensive sampling from thousands of phenotypically  
307 characterised isolates and reference strains covering all serotypes, including provisional  
308 serotypes and atypical strains, made it possible to complete, and in some cases amend, the  
309 *Shigella* population structure obtained in previous MLST and genomic studies (appendix 2 pp  
310 3-5).

311  
312 The 70-year-old *Shigella* typing scheme, which is still in use today, was based on biochemical  
313 characteristics, antigenic relationships, and tradition.<sup>10</sup> We show here that, unlike cgMLST, this  
314 scheme does not always reveal natural groupings. In particular, the *Shigella* serogroups/species  
315 are artificial constructs developed from data for antigen and metabolic markers affected by  
316 Insertion Sequence (IS) element mobilisation and horizontal gene transfer (appendix 2 pp 3-4).  
317 The presence of large numbers of ISs and their expansions in *Shigella* genomes may alter the  
318 nature of both the O-antigen and the rare phenotypic markers identified in this bacterium with  
319 weak metabolic activity, by disrupting coding sequences or causing genome rearrangements  
320 and deletions.<sup>6</sup> For example, *S. boydii* 6 and 20 arose in subcluster 1c following the acquisition  
321 of a single IS within the *rfb* cluster of *S. boydii* 10 and 1, respectively. Serotype diversification,  
322 which is observed mostly in clusters S1 to S3, also occurs via horizontal gene transfer of the O  
323 antigen-encoding *rfb* cluster from *Escherichia* donors.<sup>5,18</sup> Horizontal gene transfer outside of  
324 the *rfb* cluster can also alter the serotype of a strain, as illustrated particularly clearly by the S3  
325 cluster. All the *S. flexneri* strains in this cluster share the same O-antigen backbone structure  
326 and their serotypes are determined by glucosylation and/or O-acetylation modifications to the  
327 O-antigen tetrasaccharide repeat, conferred by prophage-encoded *gtr* and/or *oac* genes,  
328 respectively.<sup>12</sup> Plasmid-mediated serotype conversion by the O-antigen phosphoethanolamine  
329 transferase gene (*opt*) has also been reported in *S. flexneri*.<sup>12</sup> Each of the seven *S. flexneri*  
330 phylogenetic groups (PGs) described by Connor and colleagues,<sup>2</sup> based on a cgSNV analysis,  
331 contained two or more of these serotypes. As this serotyping method does not reflect the genetic  
332 relatedness between *Shigella* isolates, and has a number of other disadvantages, including being  
333 time-consuming, with intra- and interspecies cross-reactivity, and the impossibility of typing  
334 rough strains and new serotypes,<sup>11,26</sup> modern laboratory surveillance of *Shigella* infections  
335 should now be based on phylogenetically relevant methods rather than simply on molecular or

336 *in silico* serotyping.<sup>7,11-13</sup> In our hands, the cgMLST HC analysis proved to be the method of  
337 choice for monitoring the trends in *Shigella* types. The different types of *Shigella* can be  
338 identified with HC2000. Higher resolution, with HC1100 and, in certain cases, HC400, can  
339 reveal additional subclusters. This is particularly interesting for S3, which contains the *S.*  
340 *flexneri* 1-5, X, and Y serotypes generated via horizontal gene transfer rather than by vertical  
341 descent. We therefore recommend integrating the seven phylogenetic groups (PG1-PG7)  
342 described for *S. flexneri* into routine genomic surveillance for *S. flexneri*. These PGs can be  
343 easily inferred from cgMLST HC1000/HC400; it is even possible to obtain up to eight groups  
344 (after subdividing PG1 into PG1a and PG1b). The cgMLST HC analysis also provides, in a  
345 single step, a wide range of clustering levels, from HC0 (no allelic difference allowed) to  
346 HC2350 (maximum of 2,350 allelic differences), with a standard nomenclature. For the most  
347 frequent *Shigella* serotypes, such as *S. sonnei* and *S. flexneri* 2a, higher resolution levels, such  
348 as HC5 and HC10, can also help to identify a single-source outbreak or an epidemic strain,  
349 before confirmation by cgSNV analysis. The use of cgMLST HC data also makes it possible to  
350 query EnteroBase, which contains over 160,000 *E. coli/Shigella* genomes, to identify strains  
351 with similar HC types. This can facilitate the investigation of unusual types of *Shigella* or  
352 outbreaks with an international dimension. HC10 was recently used to investigate the origins  
353 of an outbreak of *S. sonnei* infections in Belgium, and made it possible to link this outbreak to  
354 South America.<sup>29</sup>

355  
356 However, the use of cgMLST HC data in surveillance should be paired with *in silico* serotyping,  
357 to achieve backward compatibility with the current serotyping scheme. This is a very important  
358 point for the maintenance of international surveillance with laboratories that cannot currently  
359 afford genomic surveillance and to prevent disjunction with the seven decades of serotyping  
360 data accumulated worldwide. For this purpose, we found that ShigEiFinder had the best

361 performance of the three available tools.<sup>13</sup> However, it requires optimisation for certain  
362 serotypes. The complete set of *rfb* sequences provided by our study would be helpful for  
363 improving this tool.

364

365 In conclusion, by studying >4,000 serotyped reference strains and routine isolates covering the  
366 overall diversity of *Shigella*, we were able to demonstrate that cgMLST is a robust and portable  
367 genomic method revealing natural groupings for this pathovar of *E. coli*. The cgMLST method  
368 has strong added value in the framework of the laboratory monitoring of *Shigella*, as it prevents  
369 genetically unrelated strains being conflated, and genetically related strains being separated.  
370 However, we strongly recommend combining cgMLST with *in silico* serotyping to maintain  
371 backward compatibility with the current *Shigella* serotyping scheme.

372

### 373 **ACKNOWLEDGMENTS**

374 We thank all corresponding laboratories for sending isolates to the French National Reference  
375 Centre for *E. coli*, *Shigella*, and *Salmonella*. We also thank the sequencing teams at the  
376 Institut Pasteur (P2M-Plateforme de Microbiologie Mutualisée) and the Wellcome Sanger  
377 Institute for sequencing the samples.

378

### 379 **AUTHOR CONTRIBUTIONS**

380 FXW conceived and designed the study. IY, EH, LF and FXW did the genomic analyses. IY  
381 and FXW contributed to data interpretation and visualisation. CR, IC and MLC conducted the  
382 laboratory experiments. SL, CR, IC, MLC, MPG, DC, and FXW contributed to isolate  
383 acquisition and data collection. FXW, FD, RR and NRT were responsible for funding  
384 acquisition. FXW and IY drafted the article. LF, EH, RR, DC, MPG, SL, FD, and NRT



385 critically reviewed the draft. All authors read and approved the final manuscript. IY and FXW

386 accessed and verified the underlying data.

387

388 **References**

- 389 1 Khalil IA, Troeger C, Blacker BF, *et al.* Morbidity and mortality due to *Shigella* and  
390 enterotoxigenic *Escherichia coli* diarrhoea: the Global Burden of Disease Study 1990–  
391 2016. *Lancet Infect Dis* 2018; **18**: 1229–40.
- 392 2 Connor TR, Barker CR, Baker KS, *et al.* Species-wide whole genome sequencing reveals  
393 historical global spread and recent local persistence in *Shigella flexneri*. *Elife* 2015; **4**:  
394 e07335.
- 395 3 Hawkey J, Paranagama K, Baker KS, *et al.* Global population structure and genotyping  
396 framework for genomic surveillance of the major dysentery pathogen, *Shigella sonnei*. *Nat*  
397 *Commun* 2021; **12**: 2684.
- 398 4 Ewing WH. *Shigella* nomenclature. *J Bacteriol* 1949; **57**: 633–8.
- 399 5 Pupo GM, Lan R, Reeves PR. Multiple independent origins of *Shigella* clones of  
400 *Escherichia coli* and convergent evolution of many of their characteristics. *PNAS* 2000; **97**:  
401 10567–72.
- 402 6 Hawkey J, Monk JM, Billman-Jacobe H, Palsson B, Holt KE. Impact of insertion  
403 sequences on convergent evolution of *Shigella* species. *PLoS Genet* 2020; **16**: e1008931.
- 404 7 Chattaway MA, Schaefer U, Tewolde R, Dallman TJ, Jenkins C. Identification of  
405 *Escherichia coli* and *Shigella* Species from Whole-Genome Sequences. *J Clin Microbiol*  
406 2017; **55**: 616–23.
- 407 8 Pettengill EA, Pettengill JB, Binet R. Phylogenetic Analyses of *Shigella* and  
408 Enteroinvasive *Escherichia coli* for the Identification of Molecular Epidemiological  
409 Markers: Whole-Genome Comparative Analysis Does Not Support Distinct Genera  
410 Designation. *Front Microbiol* 2015; **6**: 1573.
- 411 9 Hyma KE, Lacher DW, Nelson AM, *et al.* Evolutionary genetics of a new pathogenic  
412 *Escherichia* species: *Escherichia albertii* and related *Shigella boydii* strains. *J Bacteriol*  
413 2005; **187**: 619–28.
- 414 10 Strockbine NA, Maurelli AT. *Shigella*. In: *Bergey's Manual of Systematics of Archaea and*  
415 *Bacteria*. *American Cancer Society*, 2015: 1–26.
- 416 11 Wu Y, Lau HK, Lee T, Lau DK, Payne J. *In Silico* Serotyping Based on Whole-Genome  
417 Sequencing Improves the Accuracy of *Shigella* Identification. *Appl Environ Microbiol*  
418 2019; **85**.
- 419 12 Brengi SP, Sun Q, Bolaños H, *et al.* PCR-based method for *Shigella flexneri* serotyping:  
420 International multicenter validation. *J Clin Microbiol* 2019; **57**.
- 421 13 Zhang X, Payne M, Nguyen T, Kaur S, Lan R. Cluster-specific gene markers enhance  
422 *Shigella* and Enteroinvasive *Escherichia coli* *in silico* serotyping. *bioRxiv* 2021; :  
423 2021.01.30.428723.
- 424 14 Moura A, Criscuolo A, Pouseele H, *et al.* Whole genome-based population biology and  
425 epidemiological surveillance of *Listeria monocytogenes*. *Nat Microbiol* 2016; **2**: 1–10.

- 426 15 Zhou Z, Alikhan N-F, Mohamed K, *et al.* The EnteroBase user's guide, with case studies  
427 on *Salmonella* transmissions, *Yersinia pestis* phylogeny, and *Escherichia* core genomic  
428 diversity. *Genome Res* 2020; **30**: 138–52.
- 429 16 Langendorf C, Le Hello S, Moumouni A, *et al.* Enteric bacterial pathogens in children with  
430 diarrhea in Niger: diversity and antimicrobial resistance. *PLoS One* 2015; **10**: e0120275.
- 431 17 Kim J, Lindsey RL, Garcia-Toledo L, *et al.* High-Quality Whole-Genome Sequences for  
432 59 Historical *Shigella* Strains Generated with Pacbio Sequencing. *Genome Announc* 2018;  
433 **6**.
- 434 18 DebRoy C, Fratamico PM, Yan X, *et al.* Comparison of O-Antigen Gene Clusters of All O-  
435 Serogroups of *Escherichia coli* and Proposal for Adopting a New Nomenclature for O-  
436 Typing. *PLoS One* 2016; **11**: e0147434.
- 437 19 Zhou Z, Charlesworth J, Achtman M. HierCC: A multi-level clustering scheme for  
438 population assignments based on core genome MLST. *Bioinformatics* 2021.
- 439 20 Zhou Z, Alikhan N-F, Sergeant MJ, *et al.* GrapeTree: visualization of core genomic  
440 relationships among 100,000 bacterial pathogens. *Genome Res* 2018; **28**: 1395–404.
- 441 21 Venkatesan MM, Buysse JM, Kopecko DJ. Use of *Shigella flexneri ipaC* and *ipaH* gene  
442 sequences for the general identification of *Shigella* spp. and enteroinvasive *Escherichia*  
443 *coli*. *J Clin Microbiol* 1989; **27**: 2687–91.
- 444 22 Figge RM, Ramseier TM, Saier MH. The mannitol repressor (MtlR) of *Escherichia coli*. *J*  
445 *Bacteriol* 1994; **176**: 840–7.
- 446 23 Aslanidis C, Schmitt R. Regulatory elements of the raffinose operon: nucleotide sequences  
447 of operator and repressor genes. *J Bacteriol* 1990; **172**: 2178–80.
- 448 24 Rezwani F, Lan R, Reeves PR. Molecular basis of the indole-negative reaction in *Shigella*  
449 strains: extensive damages to the *tna* operon by insertion sequences. *J Bacteriol* 2004; **186**:  
450 7460–5.
- 451 25 Ochman H, Selander RK. Standard reference strains of *Escherichia coli* from natural  
452 populations. *J Bacteriol* 1984; **157**: 690–3.
- 453 26 Coimbra RS, Lenormand P, Grimont F, Bouvet P, Matsushita S, Grimont PAD. Molecular  
454 and Phenotypic Characterization of Potentially New *Shigella dysenteriae* Serotype. *J Clin*  
455 *Microbiol* 2001; **39**: 618–21.
- 456 27 Melito PL, Woodward DL, Munro J, *et al.* A Novel *Shigella dysenteriae* Serovar Isolated  
457 in Canada. *J Clin Microbiol* 2005; **43**: 740–4.
- 458 28 Yang J, Nie H, Chen L, *et al.* Revisiting the molecular evolutionary history of *Shigella* spp.  
459 *J Mol Evol* 2007; **64**: 71–9.
- 460 29 Van den Bossche A, Ceysens P-J, Denayer S, *et al.* Outbreak of Central American born  
461 *Shigella sonnei* in two youth camps in Belgium in the summer of 2019. *Eur J Clin*  
462 *Microbiol Infect Dis* 2021.

463 **Figure 1.** A NINJA neighbour-joining GrapeTree showing the population structure of *Shigella*  
464 spp. based on the cgMLST allelic differences between 493 *Shigella* and *E. coli* reference  
465 genomes. (A) The tree nodes are colour-coded by *Shigella* serogroup and *E. coli* pathovar. (B)  
466 The tree nodes are colour-coded by HC2000 data. HC2000 clusters with fewer than two isolates  
467 are represented by white nodes. The different *Shigella* cgMLST clusters are labelled. For the  
468 SON cluster, the different genomic lineages of *S. sonnei* are indicated with Latin numerals. For  
469 the *S. flexneri* serotypes in cluster S3, the phylogenetic groups (PG1 to PG7) are also indicated.  
470 The interactive version of the tree is publicly available from  
471 [http://enterobase.warwick.ac.uk/ms\\_tree?tree\\_id=55118](http://enterobase.warwick.ac.uk/ms_tree?tree_id=55118)

472  
473 **Figure 2.** A NINJA neighbour-joining GrapeTree showing the population structure of the  
474 *Shigella* S1 cluster (HC2000\_1465). This subtree is based on the tree shown in Figure 1. The  
475 tree nodes are colour-coded by serogroup. The numbers within nodes indicate the serotype.  
476 HC1100 designation is indicated next to each subcluster. Novel *Shigella* serotypes are also  
477 shown. NST, = non-serotypable.

478  
479 **Figure 3.** A NINJA neighbour-joining GrapeTree showing the population structure of the  
480 *Shigella* S2 cluster (HC2000\_4118). This subtree is based on the tree shown in Figure 1. The  
481 tree nodes are colour-coded by serogroup. The numbers within nodes indicate the serotype.  
482 HC1100 designation is indicated next to each subcluster. Novel and provisional (prov.) *Shigella*  
483 serotypes are also shown.

484  
485 **Figure 4.** A NINJA neighbour-joining GrapeTree showing the population structure of the  
486 *Shigella* S3 cluster (HC2000\_192). This subtree is based on the tree shown in Figure 1 (A). The  
487 tree nodes are colour-coded by HC1100 data. The *S. flexneri* phylogenetic groups (PG)  
488 identified by Connor and colleagues are indicated.<sup>2</sup> Some HC400 clusters are indicated to  
489 separate PG3 from PG1. *S. boydi* 21 (formerly prov. E1621-54) is shown. (B) The tree nodes  
490 are colour-coded by *S. flexneri* serotype.

491  
492 **Figure 5.** A maximum-likelihood phylogenetic tree showing the population structure of 493  
493 *Shigella* and *E. coli* reference genomes based on 8,003 core-genome single-nucleotide variants

494 (SNVs). Nodes supported by bootstrap values  $\geq 95\%$  are indicated by red dots. Phylogenetic  
495 clades containing *Shigella* genomes are labelled with the same nomenclature as in Figure 1. All  
496 the *Shigella* genomes are also labelled on the right with cgMLST HC2000 and HC1000 data.  
497  
498

A

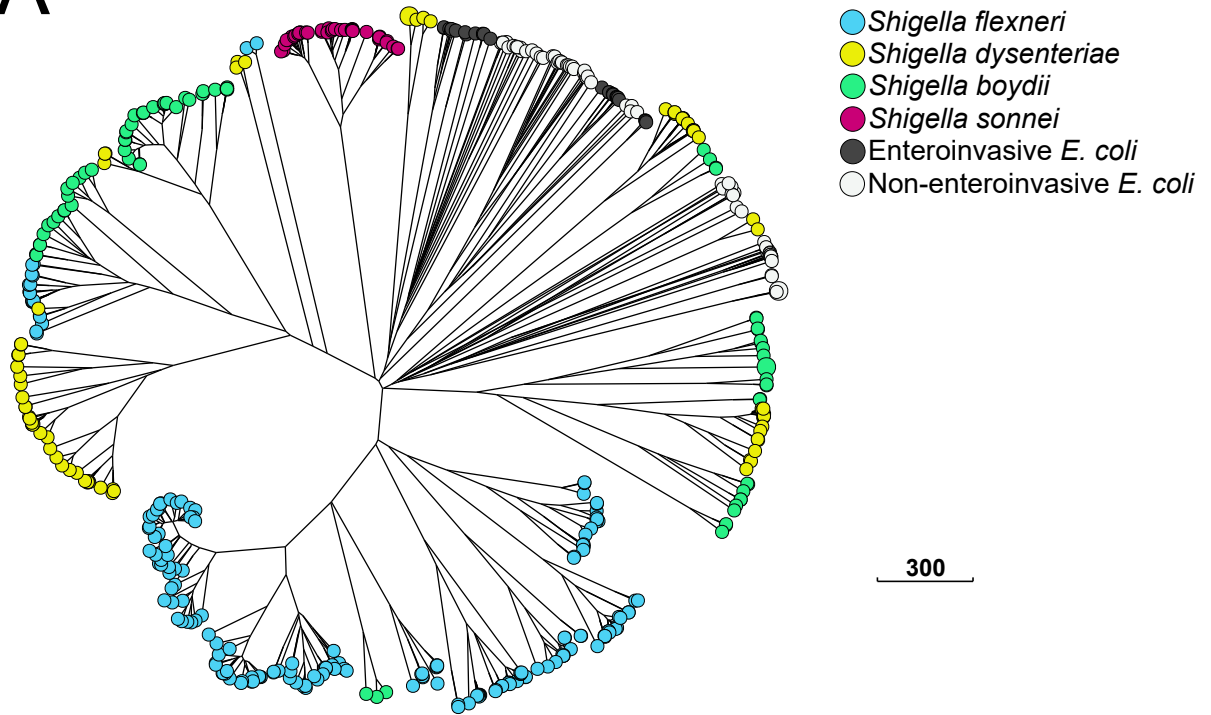

B

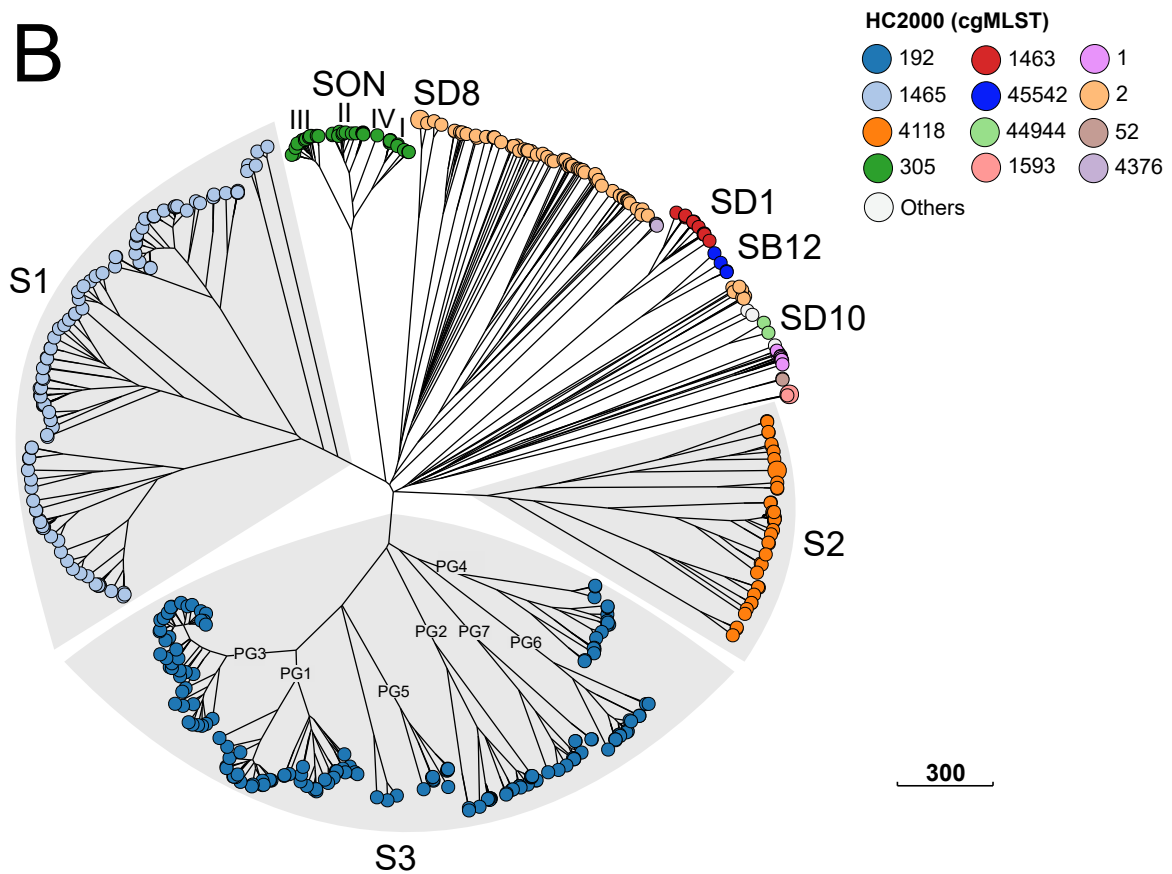

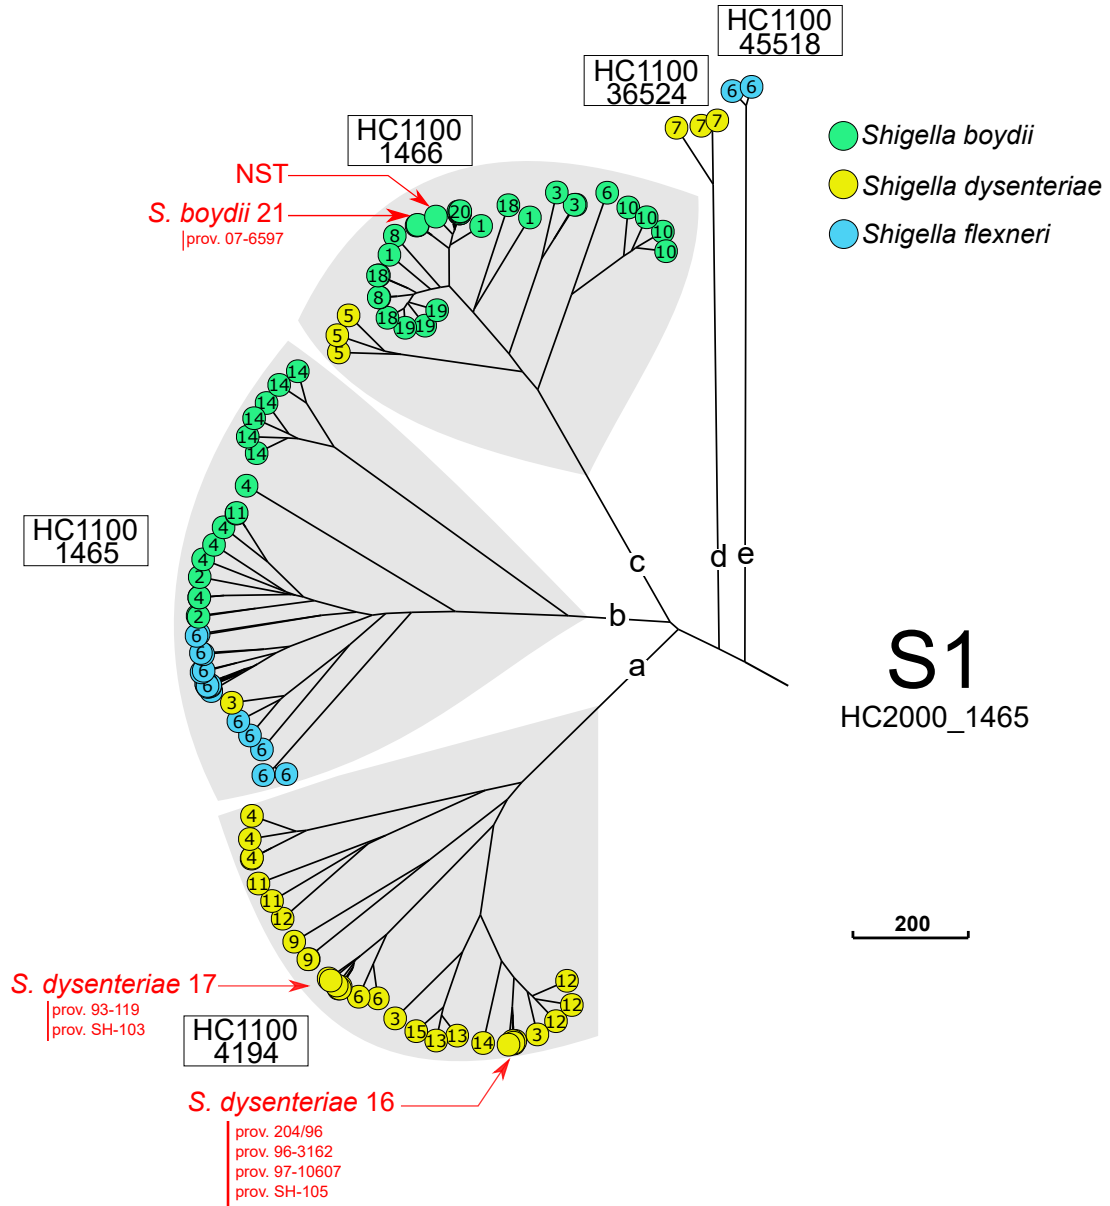

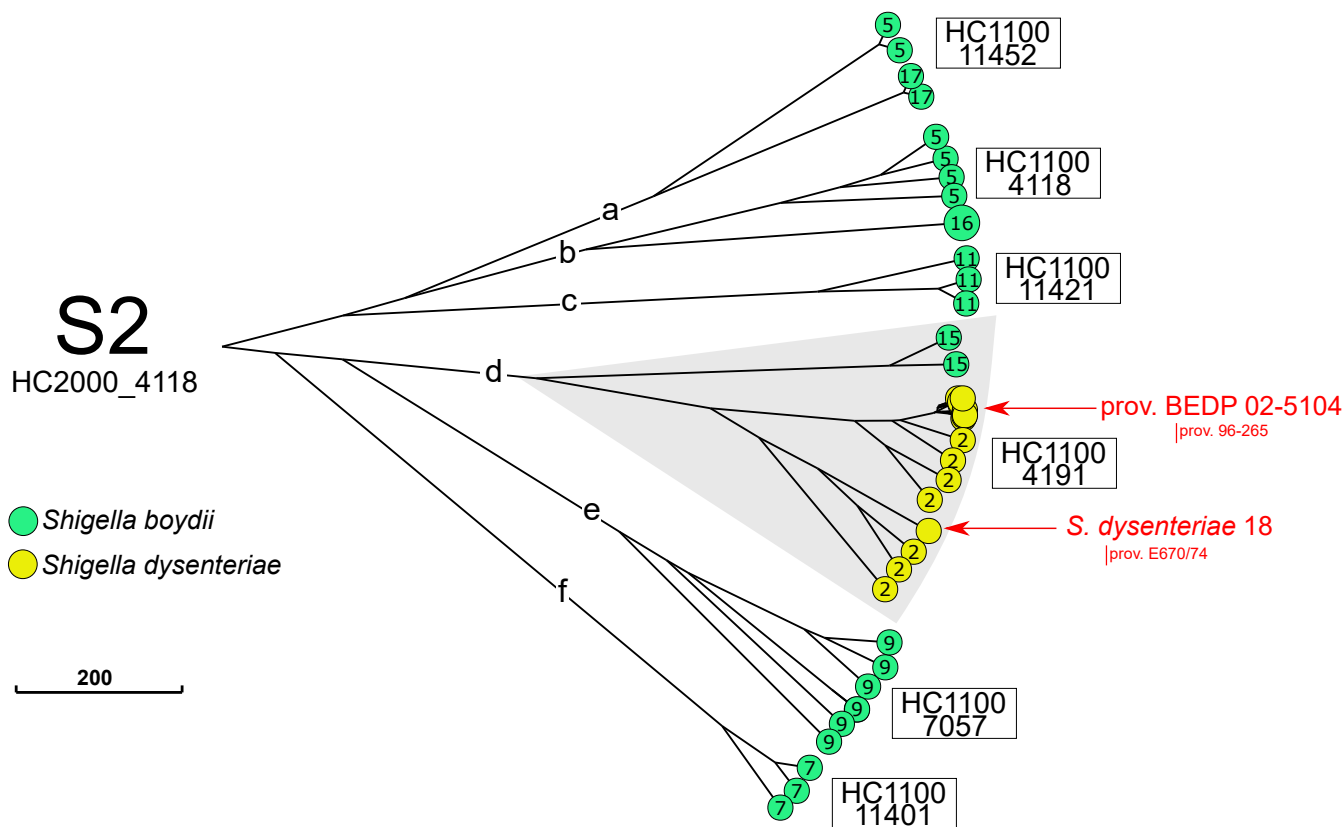



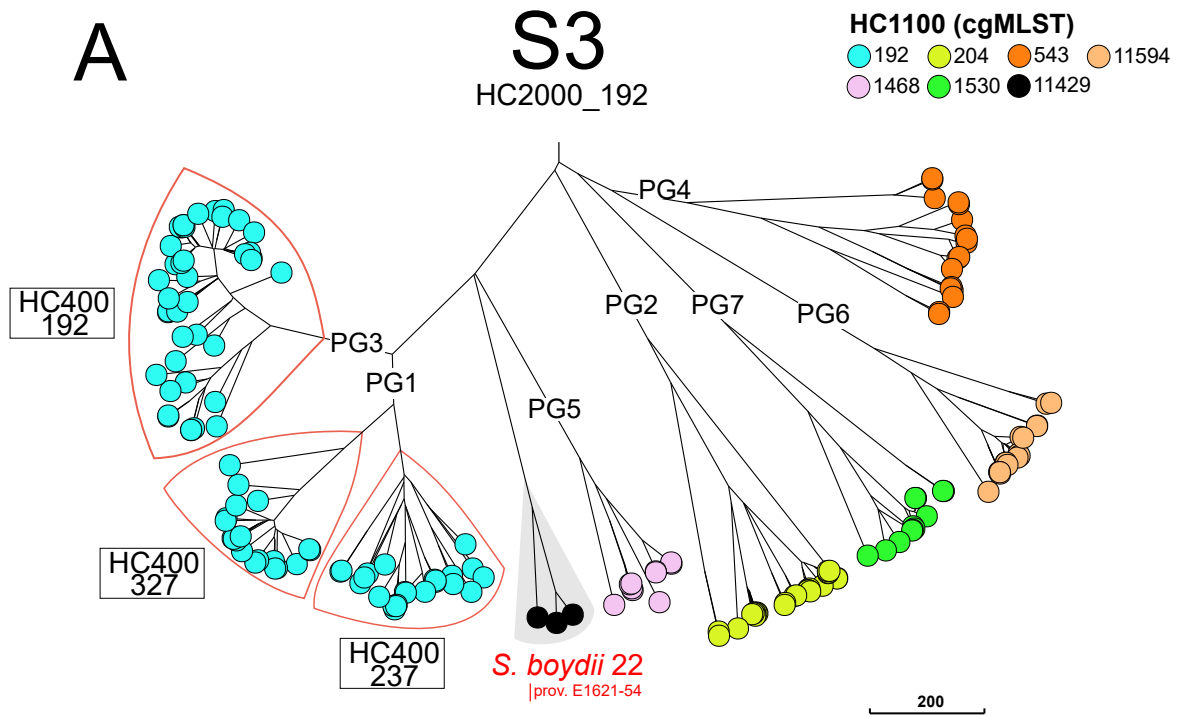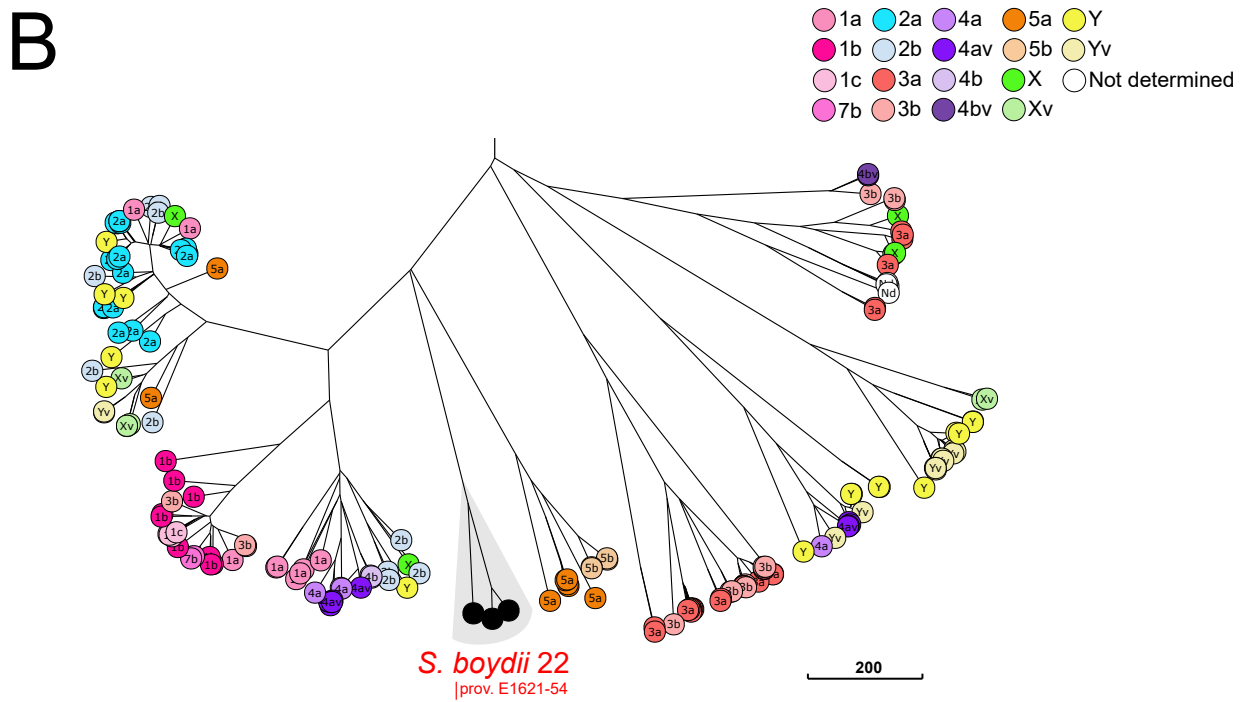

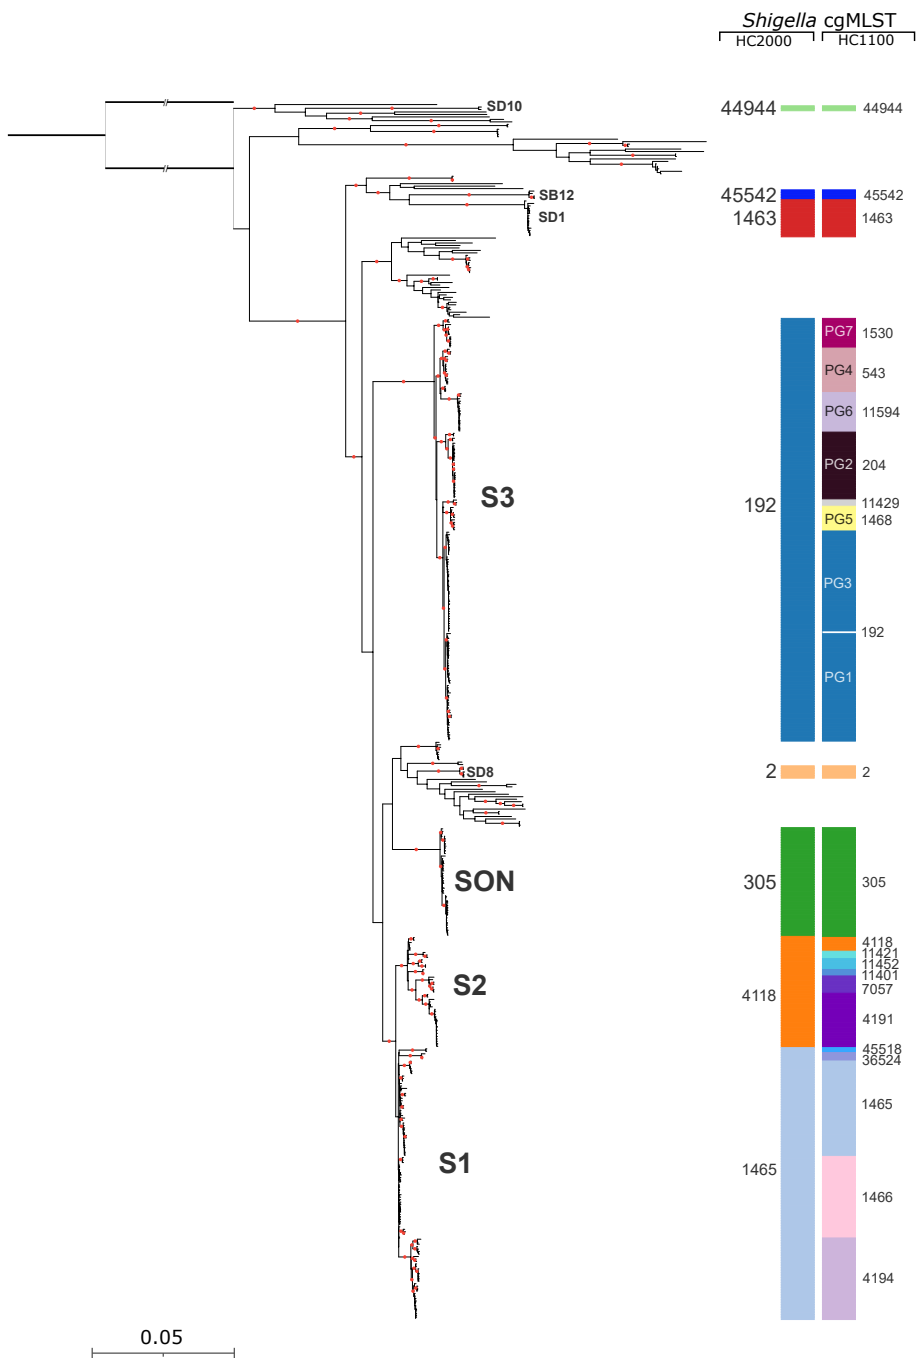

Source: http://biorxiv.org/content/10.1101/2021.06.08.447214v1.full.pdf
